# Supplementary material
Source: PubMed Central journal article supplement (PMC4798927)
Supplement: NIHMS748669-supplement-1.pdf [file NIHMS748669-supplement-1.pdf]

## Supplementary Information

### Allosteric substrate switching in a voltage sensing lipid phosphatase

Sasha S. Grimm<sup>1</sup> and Ehud Y. Isacoff<sup>1,2,3,4,\*</sup>

<sup>1</sup> Biophysics Graduate Group, University of California, Berkeley, CA, USA

<sup>2</sup> Department of Molecular and Cell Biology, University of California, Berkeley, CA, USA

<sup>3</sup> Helen Wills Neuroscience Institute, University of California, Berkeley, CA, USA

<sup>4</sup> Physical Bioscience Division, Lawrence Berkeley National Laboratory, Berkeley, California, USA

\* Address correspondence to: ehud@berkeley.edu

## Supplementary Results

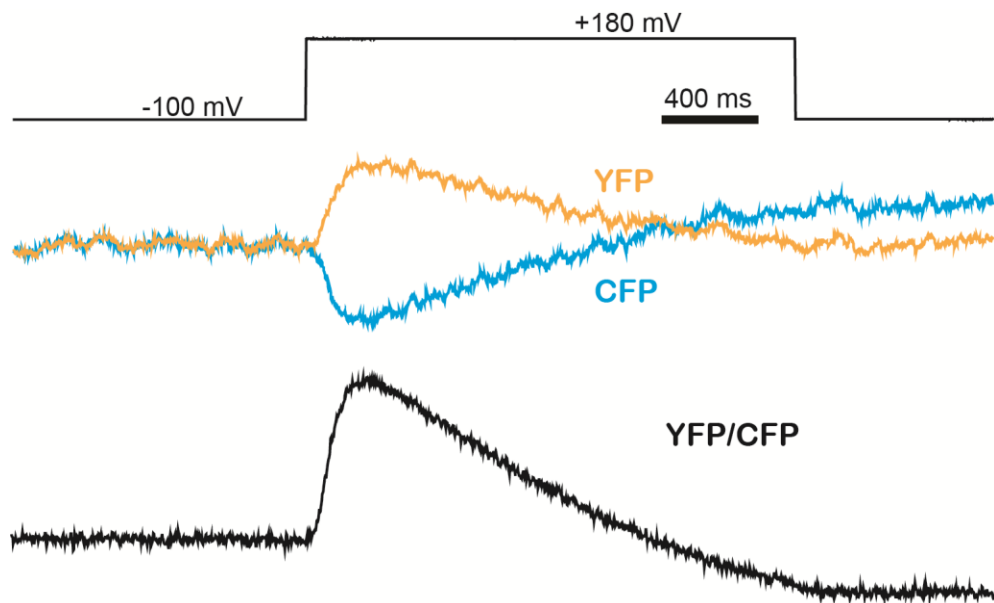

**Supplementary Figure 1. Membrane-Associated F-TAPP Reporter fluorescence signals.** A depolarizing voltage step to an oocyte co-expressing WT Ci-VSP and the F-TAPP reporter elicits a transient rise in YFP fluorescence and a parallel decrease in CFP fluorescence due to FRET, which is expressed as the YFP/CFP signal.

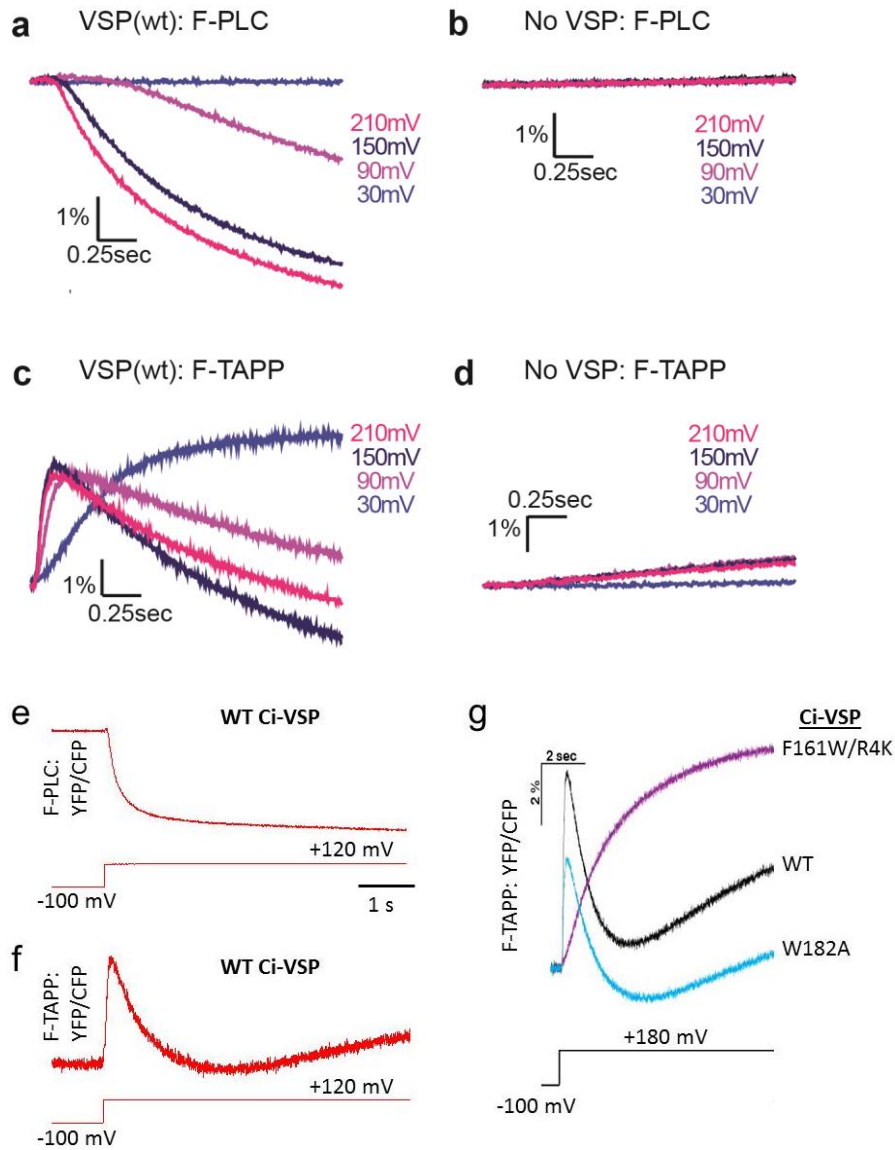

**Supplementary Figure 2. Specific detection of Ci-VSP activity in *Xenopus* oocytes with new FRET  $\text{PIP}_2$  reporters.** F-PLC (a,b) and F-TAPP (c,d) YFP/CFP fluorescence responses to depolarizing steps in oocytes co-expressing WT Ci-VSP (a,c) and without Ci-VSP (b,d). No background activity detected by F-PLC (b). Small background activity detected by F-TAPP (d) (that is likely due to a native *Xenopus* oocyte VSP) is slow, only seen at high depolarizations and is expected to blunt the late phase of decrease in YFP/CFP signal and so lead to a small underestimate. e-g) Activity elicited by long depolarizing voltage steps to +120 mV (e,f), or +180 mV (g), using F-PLC to track PI(4,5)P<sub>2</sub> (e) or F-TAPP to track PI(3,4)P<sub>2</sub> (f and g, black trace). Drop in PI(4,5)P<sub>2</sub> triggered in oocytes expressing WT Ci-VSP is sustained (e), whereas drop in PI(3,4)P is not. This difference can be attributed to presence of background PI(3,4,5)P<sub>3</sub>→PI(3,4)P<sub>2</sub> activity at strong depolarizations of a VSP that is native to *Xenopus* oocytes (d). No such background activity contaminates the F-PLC signal (e), as seen when F-PLC is expressed alone (b). The background VSP activity is greater at +180 mV (g, black trace) than at +120 mV (f).

## G214C\*

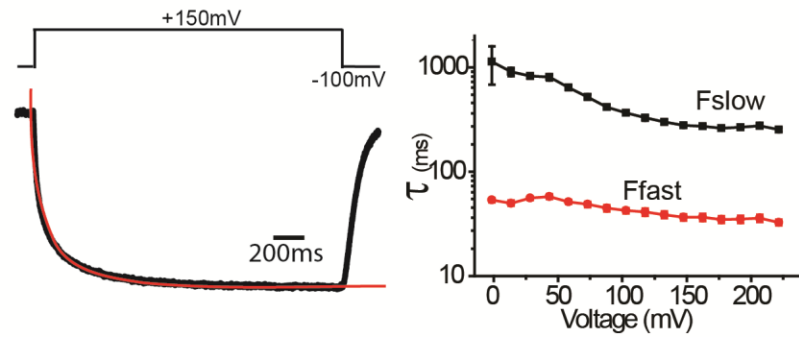

**Supplementary Figure 3. Two exponential fluorescence decrease of G214C-TMRM (G214C\*) in response to depolarization step. Left)** Fluorescence trace evoked by step to +150 mV is well fit by double exponential ( $\tau_{\text{fast}} = 36.5 \pm 7.5$  s,  $\tau_{\text{slow}} = 278.2 \pm 12.8$  s; n=8), this fast component was earlier associated with gating charge movement and slow component with a relaxation step<sup>37</sup>. **Right)** Voltage dependence of fast and slow components of G214C-TMRM fluorescence show that fast component is always ~10-fold faster than the slow component. This indicates that the slow component is too slow to account for the fast transition to the A1 active state seen by F-TAPP.

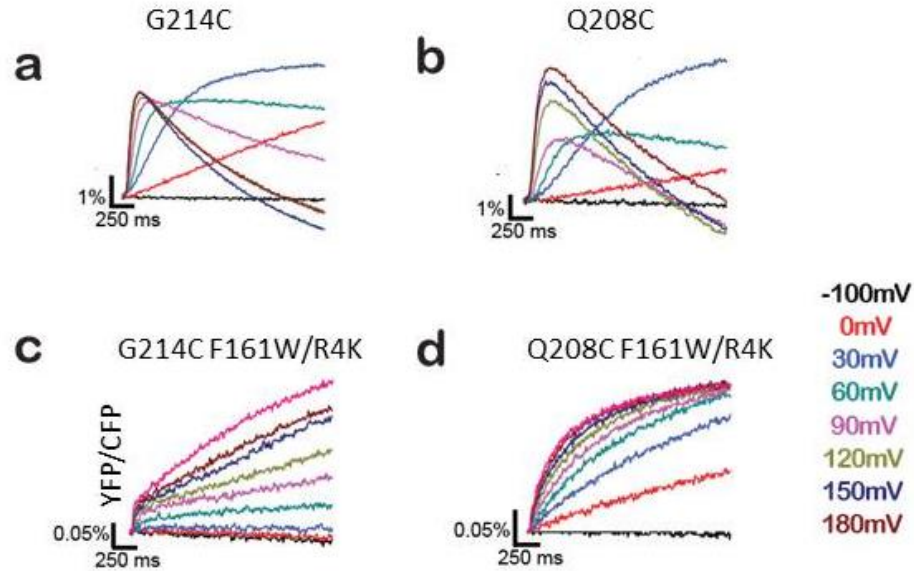

**Supplementary Figure 4. Comparison of F-TAPP readout of activity in WT and mutant Ci-VSP which contains the cysteine labeling site (for TMRM) at position G214C *versus* Q208C.** a-d) Enzyme activity read out by the F-TAPP reporter [rise and fall of PI(3,4)P<sub>2</sub>] is similar in WT Ci-VSP carrying the cysteine labeling site at G214C\* (a) (as in Fig. 5) and Q208C\* (b) (as in Fig 4). A minor difference is detected in voltage dependence and there is a better kinetic separation of the FRET increase in F161W/R4K into two components when the cysteine labeling site is at G214C\* (c) as opposed to Q208C\* (d). However, the major effect of the mutation is the same: the F161W/R4K mutant, which lacks the F3 component of VSD motion (Fig. 2h), shows a pure FRET increase, consistent with an entry into the A1 state and suppression of transition into the A2 state.

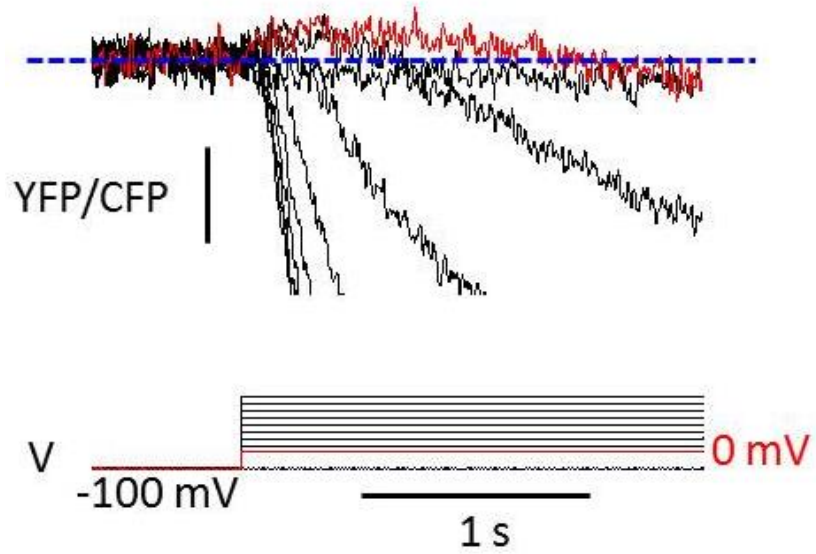

**Supplementary Figure 5. F-PLC FRET response to activity of the R217E mutant of Ci-VSP.** Activity elicited by a depolarizing voltage step to 0 mV (red trace) results in a small increase in FRET that is sustained for hundreds of milliseconds.

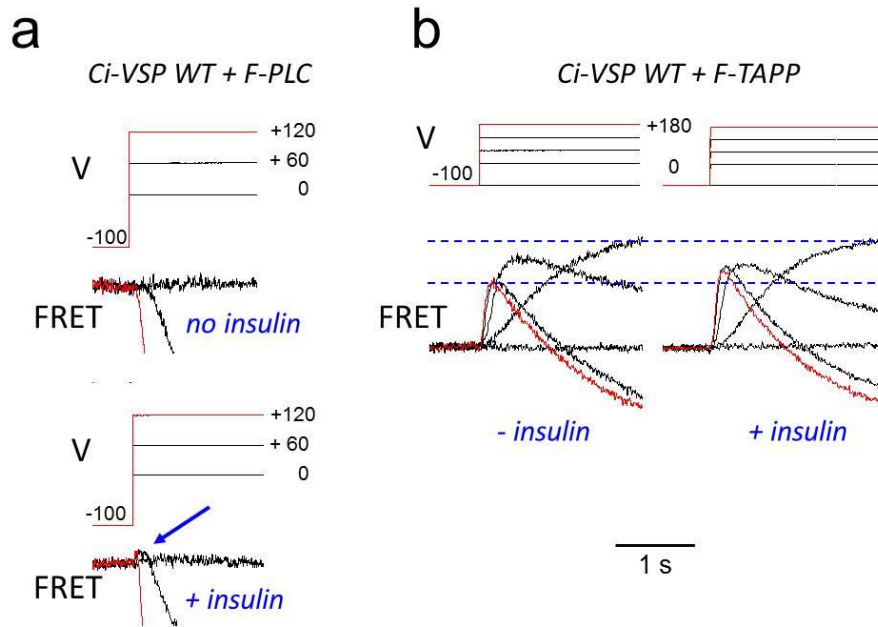

**Supplementary Figure 6. Effect of activation of PI3 kinase by insulin on activity readout by F-PLC and F-TAPP.** Oocytes pre-treated with insulin to activate native oocyte insulin receptors, which, in turn, activate PI(3) kinase. This activity leads to an increase of PIP3 due to phosphorylation of PI(4,5)P2. a, b) Pretreatment with insulin boosts the amplitude of the FRET increase component seen with F-PLC [accumulation of PI(4,5)P2] (a, arrow) and F-TAPP [accumulation of PI(3,4)P2] (b, dashed lines).

### Supplementary Figure 7. F-PLC FRET Reporter Sequence

```
1  MVSKEEELFT  GVPVILVELD  GDVNGHRFSV  SGEGEGDATY  GKLTLKFICT  TGKLPVPWPT  LVTTLTWGVQ  CFSRYPDHMK  QHDFFKSAMP
91  EGYVQERTIF  FKDDGNYKTR  AEVKFEGDTL  VNRIELKGID  FKEDGNILGH  KLEYNYISHN  VYITADKQKN  GIKAHFKIRH  NIEDGGVQLA
181  DHYQQNTPIG  DGPVLLPDNH  YLSTQSALS  DPNEKRDHVM  LLEFVTAAGI  TLGMDELYLE  EAAAREAAAR  EAAAREAAAR  EAAAREAAAR
271  SGEDLQALLK  GSQLLKVKSS  SWRRERFYKL  QEDCKTIWQE  SRKVMRTPES  QLFSIEDIQE  VRMHRTEGL  EKFARDVPED  RCFSIVFKDQ
361  RNTLDLIAPS  PADAQHWVLG  LHKIGTEAAA  REAAAREAAA  RGEEAAAREA  AAREAAARGG  RMVSKGEELF  TGVVPILVEL  DGDVNGHKFS
451  VSGEGEGDAT  YGKLTCLKIC  TTGKLPVWP  TLVTTLG YGL  QCFARYPDHM  KQHDFFKSAM  PEGYVQERTI  FFKDDGNYKT  RAEVKFEGDT
541  LVNRIELKGI  DFKEDGNILG  HKLEYNYNSH  NVYITADKQK  NGIKANFKIR  HNIEDGGVQL  ADHYQQNTPI  GDGPVLLPDN  HYL SYQSALS
631  KDPNEKRDHM  VLEFVTAAS  SEAAAREAAA  REAAAREAAA  REAAAREAAA  REAAAR
```

### Supplementary Figure 8. F-TAPP FRET Reporter Sequence

```
1  MVSKEEELFT  GVPVILVELD  GDVNGHRFSV  SGEGEGDATY  GKLTLKFICT  TGKLPVPWPT  LVTTLTWGVQ  CFSRYPDHMK
81  QHDFFKSAMP  EGYVQERTIF  FKDDGNYKTR  AEVKFEGDTL  VNRIELKGID  FKEDGNILGH  KLEYNYISHN  VYITADKQKN
161  GIKAHFKIRH  NIEDGGVQLA  DHYQQNTPIG  DGPVLLPDNH  YLSTQSALS  DPNEKRDHVM  LLEFVTAAGI  TLGMDELYLE
241  EAAAREAAAR  EAAAREAAAR  EAAAREAAAR  SGYFTP KPPQ  DSAVIKAGYC  VKQGAVMKNW  KRRYFQLDEN  TIGYFKSELE
321  KEPLRVIPLK  EVHKVQECKQ  SDIMMRDNLF  EIVTTSRTFY  VQADSPEEMH  SWIKAGTEAA  AREAAAREAA  ARGGEAAARE
401  AAAREAAARG  GRMVSKEEEL  FTGVVPILVE  LDGDVNGHKF  SVS GEGEGDA  TYGKLTCLKI  CTTGKLPVWP  PTLVTTLG YG
481  LQCFARYPDH  MKQHDFFKSA  MPEGYVQERT  IFFKDDGNYK  TRAEVKFEGD  TLVNRIELKG  IDFKEDGNIL  GHKLEYNYNS
561  HNVYITADKQ  KNGIKANFKI  RHNIEDGGVQ  LADHYQQNTP  IGDGPVLLPD  NHYL SYQSAL  SKDPNEKRDH  MVLEFVTAA
641  SSEAAAREAA  AREAAAREAA  AREAAAREAA  AREAAAR
```
